# Supplementary material
Source: Royal Society of Chemistry journal article supplement (https://www.rsc.org/suppdata/dt/1998/2241/c801175.doc)
Supplement: Supplementary file 1 [file c801175.doc]

**Supplementary material**

**Mechanistic studies on the epoxidation of alkenes with molecular oxygen and aldehydes catalyzed by transition metal--diketonate complexes.**

*B.B. Wentzel,[[1]](#footnote-2)† P.A. Gosling,† M.C. Feiters, R.J.M. Nolte[[2]](#footnote-3)**

*Department of Organic Chemistry/Nijmegen SON Research Center*

*University of Nijmegen,*

*6525 ED Nijmegen, The Netherlands*

**Abstract**

The scope, mechanism and kinetics were studied of the aerobic epoxidation of alkenes with an aldehyde and substituted -diketonate-transition metal complexes as catalysts. Diketonate complexes of nickel(II) proved to be among the best catalysts for this reaction. The epoxidation is not dependent on substrate concentration and is first order in aldehyde, catalyst and oxygen partial pressure. It was shown by reactivity studies and EPR experiments that the reaction is radical in nature. Additional evidence for this radical nature was obtained from stereochemical investigations. The metal catalyst is not only an efficient initiator of the reaction, but is also believed to enhance the reactivity of intermediate species in the oxidation process by allowing these to coordinate to the metal center. A mechanism is proposed for the catalytic reaction.

**Supplementary material**

Table I: Epoxidation of -pinene and *S*-limonene with a variety of metal catalysts.a

Catalyst Conversion (%) Yield epoxide (%) Selectivity (%)

Substrate: -pinene

Ni(II)OAc2 80 63 79

Co(II)OAc2 100 87 87

Mn(II)OAc2 48 37 77

Fe(III)OAc3 31 0 0

Ni(II)acac2 100 91 91

Mn(II)acac2 99 61 62

Fe(III)acac3 25 22 88

Pd(II)acac2 <1 <1 -

Substrate: *S*-limonene

Ni(II)acac2 70 65 93

Co(II)acac2 92 74 80

Mn(II)acac2 4 2 -b

Fe(III)acac3 69 60 87

Pd(II)acac2 <1 <1 -

Ni(II)OAc2 48 44 92

Co(II)OAc2 87 77 89c

Ni(II)dmp2d 74 63 86

Co(II)dmp2d 71 63 89

a Reaction conditions: 0.1 mol l-1 alkene, 0.3 mol l-1 isobutyraldehyde, 1.0·10-3 mol l-1 catalyst, 5.0 ml CH2Cl2, 1.0 atm. O2, 25°C, 4 hrs. b After 24 hrs. c After 1 h. d Hdmp = 1,5-di(*p*-methoxyphenyl)acetylacetone **1b**.

**Supplementary material**

Table II: Reactivity of various aldehydes as co-reactant in the epoxidation of -pinene.a

Aldehyde Yield -pinene (%)

Isobutyraldehyde 91

Butyraldehyde 5

Acetaldehydeb 2

Propionaldehyde 2

Benzaldehyde 0

Cinnamaldehyde 0

Pivaldehyde 68

Crotonaldehyde 0

a Reaction conditions: 0.1 mol l-1 alkene, 0.3 mol l-1 isobutyraldehyde, 1.0·10-3 mol l-1, catalyst Ni(II)-**1c**, 5.0 ml CH2Cl2, 1.0 atm. O2, 25°C, 4 hrs. b Due to its low boiling point, the reaction with this aldehyde was carried out at 15°C.

1. † These authors contributed equally to this paper [↑](#footnote-ref-2)
2. * Corresponding author [↑](#footnote-ref-3)
